# Supplementary material
Source: PubMed Central journal article supplement (PMC4702731)
Supplement: JCM.02047-15_zjm999094700so1.pdf [file JCM.02047-15_zjm999094700so1.pdf]

Table 1. Distribution of MSSA and MRSA clinical isolates included in the study.

| Population <sup>a</sup> | USA Census Region     | Number of States | Number of Sites | Number of isolates |
|-------------------------|-----------------------|------------------|-----------------|--------------------|
| MSSA                    | 1. New England        | 5                | 7               | 100                |
|                         | 2. Mid-Atlantic       | 3                | 23              | 100                |
|                         | 3. East North Central | 5                | 26              | 100                |
|                         | 4. West North Central | 7                | 15              | 100                |
|                         | 5. South Atlantic     | 7                | 24              | 100                |
|                         | 6. East South Central | 4                | 9               | 100                |
|                         | 7. West South Central | 4                | 14              | 100                |
|                         | 8. Mountain           | 5                | 9               | 100                |
|                         | 9. Pacific            | 5                | 18              | 100                |
|                         | Total                 |                  | 45              | 135                |
| MRSA                    | 1. New England        | 4                | 6               | 101                |
|                         | 2. Mid-Atlantic       | 3                | 23              | 100                |
|                         | 3. East North Central | 5                | 27              | 100                |
|                         | 4. West North Central | 7                | 15              | 101                |
|                         | 5. South Atlantic     | 7                | 24              | 100                |
|                         | 6. East South Central | 4                | 9               | 103                |
|                         | 7. West South Central | 4                | 14              | 101                |
|                         | 8. Mountain           | 5                | 9               | 100                |
|                         | 9. Pacific            | 5                | 18              | 101                |
|                         | Total                 |                  | 44              | 145                |

a. Methicillin-susceptible (MSSA) and -resistant (MRSA) *S. aureus* clinical isolates defined by the oxacillin and/or ceftaxime susceptibility results obtained by the reference broth microdilution and/or disk diffusion methods according to CLSI (M02-A12, M07-A10 and M100-S25).
