# Supplementary material
Source: PubMed Central journal article supplement (PMC4702731)
Supplement: JCM.02047-15_zjm999094700so2.pdf [file JCM.02047-15_zjm999094700so2.pdf]

Table 2. Summary of discrepant results obtained by methicillin (oxacillin and/or ceftioxin) susceptibility testing methods and BD MAX StaphSR.

| Phenotypic results <sup>a</sup> | Collection No | Bank No | Disk inhibition zones (mm) <sup>b</sup> |           | Oxacillin MIC (µg/ml) <sup>c</sup> | BD MAX StaphSR <sup>d</sup> | PCR screening <sup>e</sup> |
|---------------------------------|---------------|---------|-----------------------------------------|-----------|------------------------------------|-----------------------------|----------------------------|
|                                 |               |         | Oxacillin                               | Ceftioxin |                                    |                             |                            |
| MSSA                            | 748446        | 6072    | 19                                      | 24        | 0.5                                | MRSA                        | -                          |
|                                 | 782196        | 37979   | 17                                      | 26        | 0.5                                | MRSA                        | -                          |
|                                 | 765744        | 22078   | 19                                      | 24        | 0.5                                | MRSA                        | +                          |
|                                 | 750233        | 7768    | 20                                      | 29        | ≤0.25                              | MRSA                        | +                          |
|                                 | 759377        | 16072   | 16                                      | 24        | 0.5                                | MRSA                        | +                          |
|                                 | 779506        | 35348   | 21                                      | 24        | 0.5                                | MRSA                        | +                          |
|                                 | 757012        | 14135   | 16                                      | 26        | 1                                  | MRSA                        | +                          |
|                                 | 748417        | 6043    | 18                                      | 22        | 1                                  | MRSA                        | +                          |
| MRSA                            | 767512        | 23805   | 18                                      | 19        | 1                                  | MRSA                        | +                          |
|                                 | 766206        | 22640   | 17                                      | 20        | 0.5                                | MRSA                        | +                          |
|                                 | 744448        | 2293    | 17                                      | 18        | 1                                  | MRSA                        | +                          |
|                                 | 768356        | 24654   | 15                                      | 18        | 1                                  | MRSA                        | +                          |
|                                 | 750063        | 7600    | 13                                      | 19        | 2                                  | MRSA                        | +                          |
|                                 | 750786        | 8315    | 16                                      | 19        | 2                                  | MRSA                        | +                          |

a. Final methicillin susceptibility characterization based on the oxacillin and/or ceftioxin susceptibility results obtained by the reference broth microdilution and/or disk diffusion methods according to CLSI (M02-A12, M07-A10 and M100-S25). MSSA as defined by susceptible results obtained by the three phenotypic testing methods. These six MRSA isolates were susceptible to oxacillin by broth microdilution and disk diffusion tests and were characterized as methicillin-resistant by the ceftioxin disk diffusion method.

b. Oxacillin disk (1 µg) susceptibility results of ≤10 mm = resistant; 11 – 12 mm = intermediate; and ≥13 mm = susceptible (M100-S22); ceftioxin disk (30 µg) susceptibility results of ≤21 mm = resistant; and ≥22 mm = susceptible (M100-S25).

c. Oxacillin MIC results of ≤2 µg/ml = susceptible; and ≥4 µg/ml = resistant (M100-S25).

d. Final BD MAX StaphSR results obtained upon confirmation.

e. Screening for *mecA/C* using an *in-house* PCR multiplex assay. All amplicons were confirmed to match that of *mecA* by sequencing analysis.
